# Supplementary material for: Cancer in HIV-positive and HIV-negative adolescents and young adults in South Africa: a cross-sectional study
Source: PubMed Central journal article supplement (PMC8524277; doi:10.1136/bmjopen-2020-043941), 2021-10-17
Supplement: bmjopen-2020-043941supp001.pdf [file bmjopen-2020-043941supp001.pdf]

**Online Supplement Table S1: Distribution of AYAs with known and unknown HIV status by characteristics used in the imputation model**

| <b>Characteristics</b>       | <b>Unknown HIV status n (%)</b> | <b>Known HIV status n (%)</b> |
|------------------------------|---------------------------------|-------------------------------|
| <b>Age [years]</b>           |                                 |                               |
| 10                           | 162 (47.1%)                     | 182 (52.9%)                   |
| 11                           | 152 (46.8%)                     | 173 (53.2%)                   |
| 12                           | 160 (48.8%)                     | 168 (51.2%)                   |
| 13                           | 190 (52.9%)                     | 169 (47.1%)                   |
| 14                           | 210 (65%)                       | 113 (35%)                     |
| 15                           | 210 (56.3%)                     | 163 (43.7%)                   |
| 16                           | 233 (61.5%)                     | 146 (38.5%)                   |
| 17                           | 259 (61.4%)                     | 163 (38.6%)                   |
| 18                           | 276 (57.4%)                     | 205 (42.6%)                   |
| 19                           | 284 (57.3%)                     | 212 (42.7%)                   |
| 20                           | 337 (56.5%)                     | 259 (43.5%)                   |
| 21                           | 401 (57.9%)                     | 291 (42.1%)                   |
| 22                           | 451 (53.6%)                     | 391 (46.4%)                   |
| 23                           | 530 (53.2%)                     | 467 (46.8%)                   |
| 24                           | 576 (50.3%)                     | 570 (49.7%)                   |
| <b>Sex</b>                   |                                 |                               |
| Female                       | 2374 (53.6%)                    | 2051 (46.4%)                  |
| Male                         | 2057 (55.9%)                    | 1621 (44.1%)                  |
| <b>Ethnicity</b>             |                                 |                               |
| Asian                        | 106 (68.8%)                     | 48 (31.2%)                    |
| Black                        | 3521 (55.3%)                    | 2850 (44.7%)                  |
| Coloured                     | 317 (42.7%)                     | 426 (57.3%)                   |
| White                        | 487 (58.3%)                     | 348 (41.7%)                   |
| <b>Cancer diagnosis date</b> |                                 |                               |
| 2004                         | 575 (81%)                       | 135 (19%)                     |
| 2005                         | 415 (61.8%)                     | 257 (38.2%)                   |
| 2006                         | 492 (62.8%)                     | 292 (37.2%)                   |
| 2007                         | 458 (57.1%)                     | 344 (42.9%)                   |
| 2008                         | 443 (54.2%)                     | 375 (45.8%)                   |
| 2009                         | 438 (53.3%)                     | 383 (46.7%)                   |
| 2010                         | 369 (50%)                       | 369 (50%)                     |
| 2011                         | 327 (43.6%)                     | 423 (56.4%)                   |
| 2012                         | 348 (42.9%)                     | 463 (57.1%)                   |
| 2013                         | 283 (46.2%)                     | 329 (53.8%)                   |
| 2014                         | 283 (48.4%)                     | 302 (51.6%)                   |
| <b>Cancer site</b>           |                                 |                               |
| Anus                         | 13 (56.5%)                      | 10 (43.5%)                    |
| BCC                          | 60 (85.7%)                      | 10 (14.3%)                    |
| Bladder                      | 18 (85.7%)                      | 3 (14.3%)                     |
| Bone                         | 467 (66.3%)                     | 237 (33.7%)                   |
| Brain, CNS                   | 192 (67.8%)                     | 91 (32.2%)                    |
| Breast                       | 137 (71%)                       | 56 (29%)                      |
| Burkitt lymphoma             | 40 (30.5%)                      | 91 (69.5%)                    |

|                      |             |             |
|----------------------|-------------|-------------|
| Cervix               | 128 (57.9%) | 93 (42.1%)  |
| Colorectal           | 108 (59.7%) | 73 (40.3%)  |
| Connective tissue    | 334 (65.1%) | 179 (34.9%) |
| Endocrine            | 22 (42.3%)  | 30 (57.7%)  |
| Eye                  | 109 (69.4%) | 48 (30.6%)  |
| Gum                  | 1 (100%)    | 0 (0%)      |
| Haematology other    | 68 (52.7%)  | 61 (47.3%)  |
| Hodgkin lymphoma     | 228 (39.8%) | 345 (60.2%) |
| Ill defined          | 7 (100%)    | 0 (0%)      |
| Kaposi Sarcoma       | 597 (43.9%) | 764 (56.1%) |
| Kidney               | 63 (61.2%)  | 40 (38.8%)  |
| Larynx               | 1 (25%)     | 3 (75%)     |
| Leukaemia            | 321 (37.3%) | 539 (62.7%) |
| Lip                  | 8 (61.5%)   | 5 (38.5%)   |
| Liver & Bile duct    | 70 (61.4%)  | 44 (38.6%)  |
| Lung                 | 23 (76.7%)  | 7 (23.3%)   |
| Melanoma             | 76 (81.7%)  | 17 (18.3%)  |
| Mesothelioma         | 3 (100%)    | 0 (0%)      |
| Mouth                | 32 (60.4%)  | 21 (39.6%)  |
| Myeloma              | 5 (45.5%)   | 6 (54.5%)   |
| Naso-Oropharynx      | 95 (51.1%)  | 91 (48.9%)  |
| Non Hodgkin lymphoma | 253 (42.2%) | 347 (57.8%) |
| Oesophagus           | 14 (66.7%)  | 7 (33.3%)   |
| Other specified      | 42 (57.5%)  | 31 (42.5%)  |
| Ovary                | 90 (59.6%)  | 61 (40.4%)  |
| Pancreas             | 4 (57.1%)   | 3 (42.9%)   |
| Penis                | 3 (50%)     | 3 (50%)     |
| Placenta             | 53 (65.4%)  | 28 (34.6%)  |
| Primary site unknown | 172 (66.9%) | 85 (33.1%)  |
| Prostate             | 15 (83.3%)  | 3 (16.7%)   |
| SCC of skin          | 120 (74.1%) | 42 (25.9%)  |
| Salivary gland       | 51 (68%)    | 24 (32%)    |
| Skin other           | 108 (78.8%) | 29 (21.2%)  |
| Small intestine      | 7 (77.8%)   | 2 (22.2%)   |
| Stomach              | 24 (58.5%)  | 17 (41.5%)  |
| Testis               | 98 (69%)    | 44 (31%)    |
| Thyroid              | 89 (80.2%)  | 22 (19.8%)  |
| Tongue               | 7 (77.8%)   | 2 (22.2%)   |
| Uterus               | 28 (57.1%)  | 21 (42.9%)  |
| Vagina               | 10 (50%)    | 10 (50%)    |
| Vulva                | 17 (38.6%)  | 27 (61.4%)  |

**Online Supplement Table S2: Top 20 cancer in AYAs in the South African public health sector stratified by HIV status**

| <b>Cancer Site</b>  | <b>HIV positive</b> | <b>HIV negative</b> | <b>HIV unknown</b> |
|---------------------|---------------------|---------------------|--------------------|
| NADC                | 697                 | 1699                | 3411               |
| ADC                 | 1129                | 206                 | 1062               |
| Kaposi Sarcoma      | 786                 | 5                   | 617                |
| Leukaemia           | 113                 | 449                 | 338                |
| Bone                | 46                  | 197                 | 496                |
| NHL                 | 206                 | 150                 | 269                |
| Hodgkin lymphoma    | 119                 | 246                 | 235                |
| Connective tissue   | 54                  | 134                 | 348                |
| Brain, CNS          | 24                  | 75                  | 208                |
| Cervix              | 76                  | 18                  | 132                |
| Breast              | 27                  | 30                  | 140                |
| Naso-oropharynx     | 30                  | 65                  | 102                |
| Colorectal          | 15                  | 62                  | 114                |
| SCC of Skin         | 28                  | 15                  | 128                |
| Eye                 | 33                  | 19                  | 114                |
| Ovary               | 21                  | 43                  | 94                 |
| Testis              | 7                   | 39                  | 102                |
| Skin Other          | 11                  | 19                  | 114                |
| Haematology other   | 15                  | 48                  | 73                 |
| Liver and Bile duct | 10                  | 38                  | 76                 |
| Thyroid             | 7                   | 16                  | 96                 |
| Kidney              | 7                   | 34                  | 65                 |

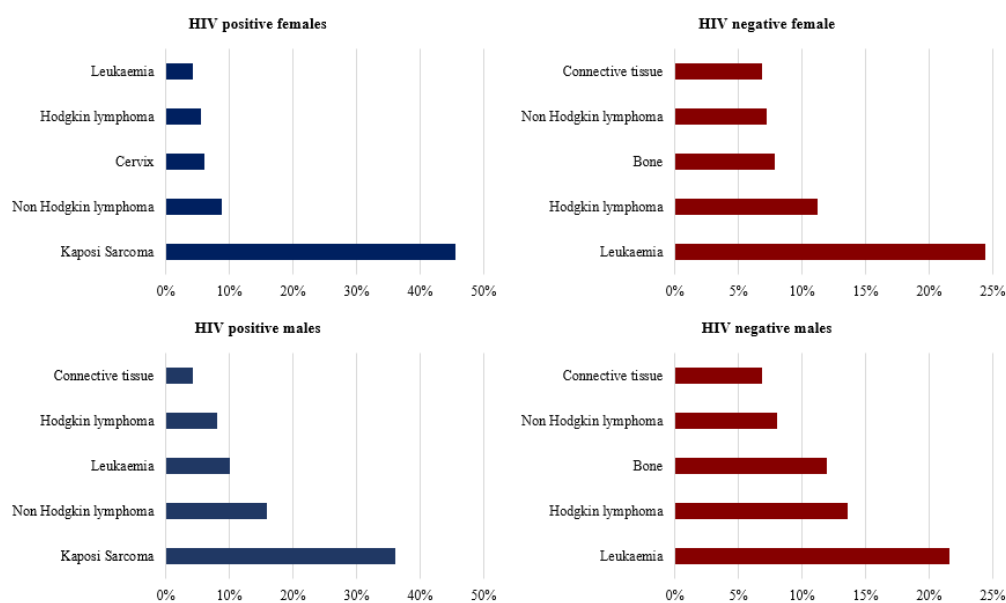

Figure S1: Top five cancers in AYAs stratified by sex and HIV status
